# Supplementary material for: Long-term follow-up of a high- and a low-intensity smoking cessation intervention in a dental setting– a randomized trial
Source: BMC Public Health. 2013 Jun 19;13:592. doi: 10.1186/1471-2458-13-592 (PMC3693879; doi:10.1186/1471-2458-13-592)
Supplement: Additional file 1: Figure S1 — Classification of predictor and outcome variables used in the present study. [file 1471-2458-13-592-S1.pdf]

| Smoke-free period                 | Predictors at 12-month follow-up | Outcome variables at long-term follow-up |                               |                             |
|-----------------------------------|----------------------------------|------------------------------------------|-------------------------------|-----------------------------|
| < past week                       | Smoker                           | Smoker                                   |                               |                             |
| $\geq$ past week                  | Point prevalence                 |                                          |                               |                             |
| $\geq$ past 6 months              | 6-month continuous abstinence    |                                          |                               |                             |
| Smoke-free ever since the program |                                  | Sustained abstinence                     |                               |                             |
|                                   |                                  |                                          | 6-month continuous abstinence | Point prevalence abstinence |
